# Supplementary figures and images for: Nano-topographic titanium modulates macrophage response in vitro and in an implant-associated rat infection model
Source: Royal Society of Chemistry journal article supplement (doi:10.1039/c6ra22667a), 2016-01-01

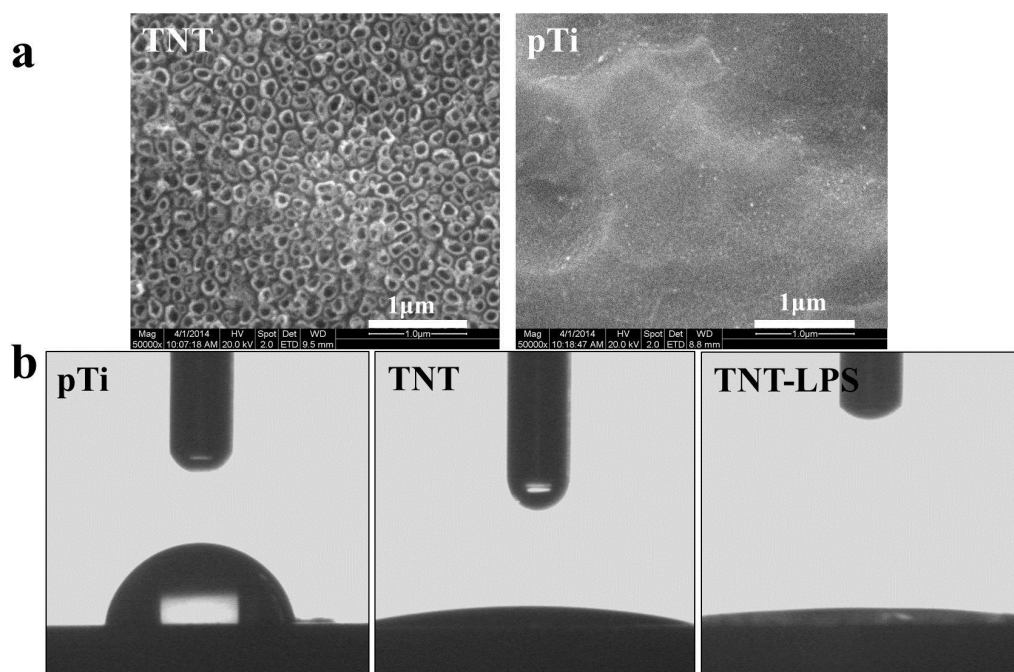

**Fig. S1**

SEM images of pTi and TNT (a); contact angle test of pTi, TNT and TNT-LPS (b).

Supplement: c6ra22667a1.pdf [file c6ra22667a1.pdf]
